# Supplementary material for: A mixed-methods community needs assessment of Santa Maria and Guadalupe, California
Source: PubMed Central journal article supplement — Discov Soc Sci Health. 2024 Nov 25;4(1):69. doi: 10.1007/s44155-024-00127-8 (PMC11588825; doi:10.1007/s44155-024-00127-8), 2024-11-25
Supplement: 44155_2024_127_MOESM1_ESM.pdf [file 44155_2024_127_MOESM1_ESM.pdf]

A Mixed-Methods Community Needs Assessment of Santa Maria and Guadalupe, California

Submitted to Journal of Community Health

Marilyn Tseng, Daisy Rojas, Edgardo Hernandez, Mario Alberto Viveros Espinoza-Kulick,

Irebid Gilbert, Maritza Perez, Elisa Gonzalez, Suzanne Phelan

Corresponding author: Marilyn Tseng, [mtseng@calpoly.edu](mailto:mtseng@calpoly.edu)

Supplemental Table. Items in long (40-item) and short (19-item) forms of survey.

|                                                                                                                                             | Also included<br>in short form |
|---------------------------------------------------------------------------------------------------------------------------------------------|--------------------------------|
| 1. Safe and affordable housing is available                                                                                                 | X                              |
| 2. Youth and adults do not abuse drugs or alcohol                                                                                           |                                |
| 3. All residents in the community have adequate emotional and social support                                                                |                                |
| 4. Mental health problems are recognized and treated in our community                                                                       | X                              |
| 5. A wide variety of recreational opportunities are available and affordable for people of all ages and levels of physical mobility         | X                              |
| 6. Dental care and preventative screenings are available for all                                                                            | X                              |
| 7. Jobs are available in the community                                                                                                      | X                              |
| 8. Children, youth, and adults maintain healthy weights and active lifestyle                                                                | X                              |
| 9. Quality childcare is available and affordable                                                                                            |                                |
| 10. Individuals are aware of and know how to access health care services                                                                    |                                |
| 11. Children and youth are free from abuse                                                                                                  |                                |
| 12. The infrastructure in our community makes it easy and safe to be physically active                                                      |                                |
| 13. People are safe in our community                                                                                                        |                                |
| 14. Adults and youth know how to avoid unsafe sex and have access to contraceptives.                                                        |                                |
| 15. Our community has an adequate number of health professionals who understand our language and culture                                    | X                              |
| 16. People who identify as LGBTQ+ are not discriminated against                                                                             |                                |
| 17. Healthy foods are available and affordable for all                                                                                      | X                              |
| 18. People of color are not discriminated against                                                                                           | X                              |
| 19. People have voice and influence in things that matter to them                                                                           |                                |
| 20. Alcoholism & drug dependence are recognized and treatment is available                                                                  |                                |
| 21. People in the neighborhood work together to solve local problems                                                                        | X                              |
| 22. Individuals are free from physical or verbal abuse from their spouses or partners                                                       |                                |
| 23. Local air, water, and soil is free from pollutants                                                                                      |                                |
| 24. Neighbors feel a sense of belonging to each other and this place                                                                        |                                |
| 25. Police serve the interest of people in this neighborhood                                                                                | X                              |
| 26. Older adults enjoy a good quality of life in our community                                                                              |                                |
| 27. Our schools work well                                                                                                                   |                                |
| 28. Pregnant women and new mothers adopt healthy behaviors (e.g. breastfeeding, avoid smoking or using alcohol or drugs, eat healthy foods) |                                |
| 29. Victims of rape and sexual assault get the help they need                                                                               | X                              |
| 30. People have opportunities to receive education or skills training                                                                       |                                |
| 31. This is a healthy place to live                                                                                                         |                                |
| 32. There are resources to help people identify and manage COVID-19                                                                         | X                              |

|                                                                                                         |   |
|---------------------------------------------------------------------------------------------------------|---|
| 33. People of all ages and abilities have available transportation                                      | X |
| 34. Adults receive recommended vaccinations                                                             |   |
| 35. My family members and I are treated with respect by other people in the community                   | X |
| 36. Children and youth have access to basic medical services                                            | X |
| 37. Laws against selling or providing alcohol to minors are strictly enforced                           |   |
| 38. Laws against selling or providing cigarettes and smokeless tobacco to minors are strictly enforced. | X |
| 39. Pregnant women access early prenatal care                                                           | X |
| 40. Children and youth are up to date on their immunizations                                            | X |
